# Supplementary material for: GLRA2 gene mutations cause high myopia in humans and mice
Source: PubMed Central journal article supplement — J Med Genet. 2022 Apr 8;60(2):193–203. doi: 10.1136/jmedgenet-2022-108425 (PMC9887403; doi:10.1136/jmedgenet-2022-108425), 2022-04-08
Supplement: jmedgenet-2022-108425supp001.pdf [file jmedgenet-2022-108425supp001.pdf]

Online Supplemental material

Supplemental Figures and legends

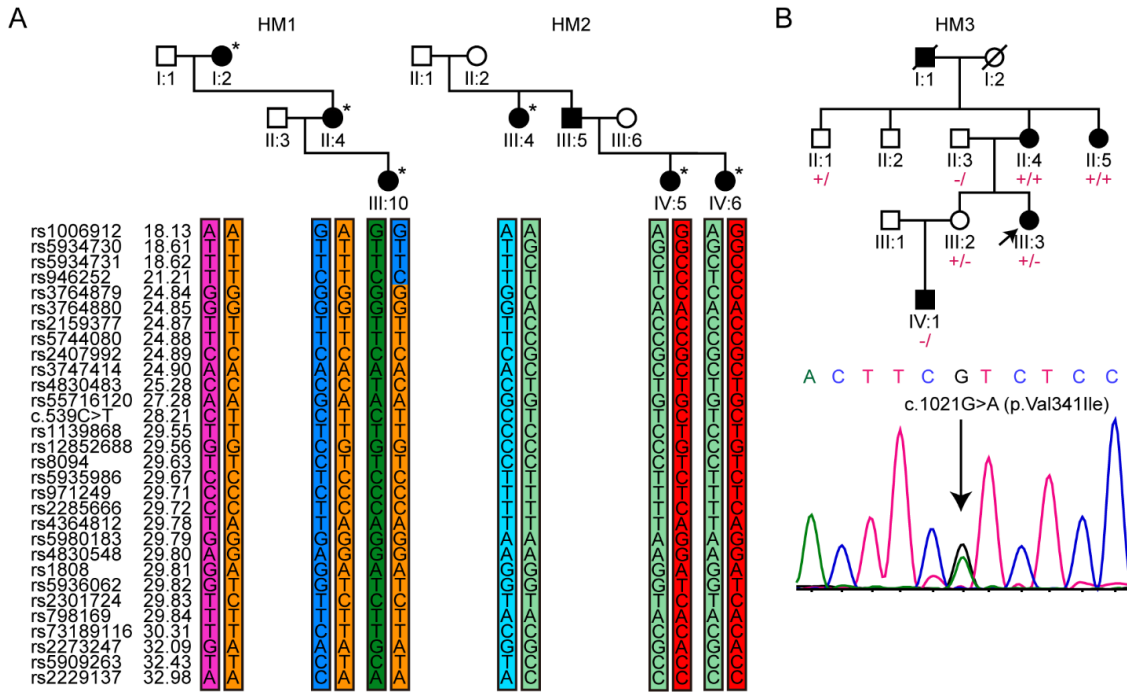

**Supplemental Figure 1.** Haplotype of HM1 and HM2 families and *GLRA2* variants detected in HM3

family. (A) The haplotype of HM1 and HM2 families shows no founder effect. (B) Co-segregation status of variant c.1021G>A (p.Val341Ile) in HM3 family. □' and '○' symbols present asymptomatic male and female subjects, respectively; '■' and '●' characters stand for male and female patients, respectively. Samples selected for ES were marked with '\*'. '+' stands for wild-type allele and '-' refers to c.1021G>A variant in *GLRA2* gene.

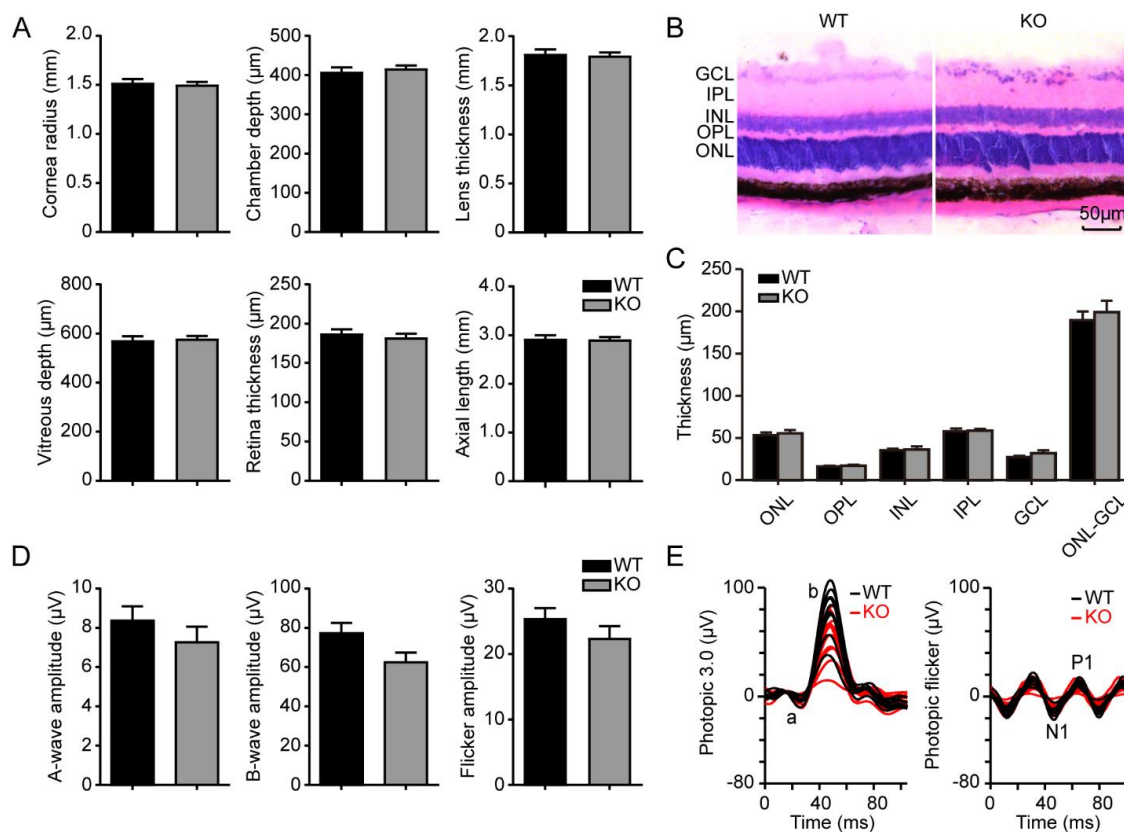

**Supplemental Figure 2.** Assessment of ocular parameters, retinal stratification, and photopic-electroretinography response of *Glra2* knockout mice. (A) Normalized ocular parameters measured using optical coherence tomography. (B) Retinal stratification observed using hematoxylin and eosin staining. (C) Statistical results of (B). (D, E) Light-adapted electroretinography responses of *Glra2* knockout and wild-type mice. *Glra2* knockout mice show a decreased amplitude of photopic 3.0 a and b waves and flicker response, but the differences have no statistical significance. Data are represented as mean±SEM.

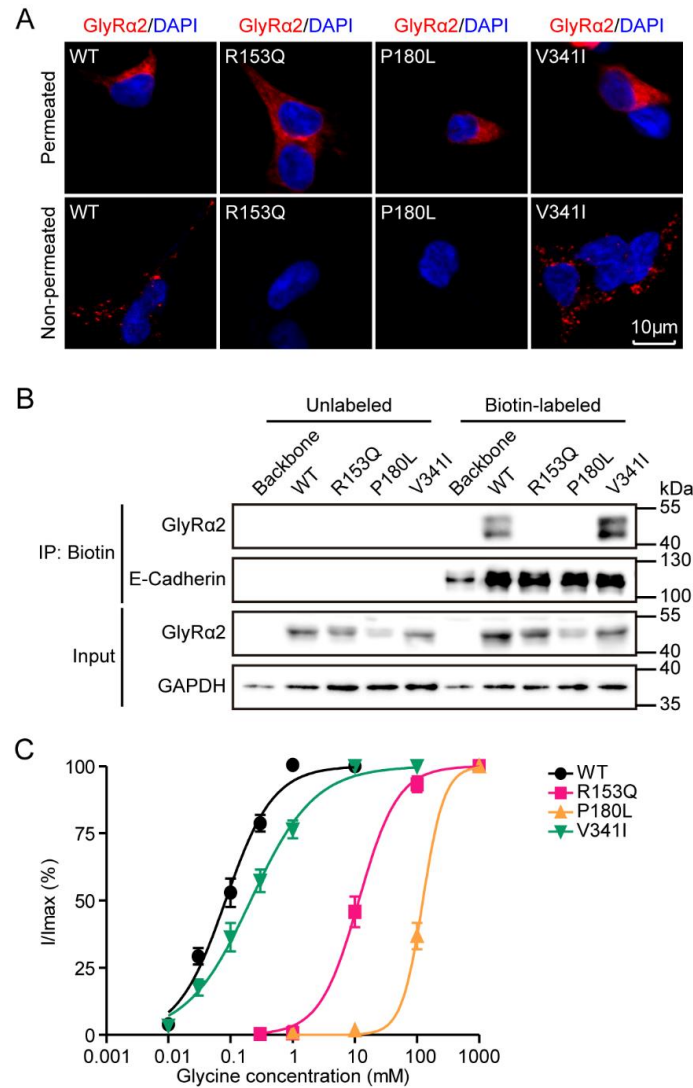

**Supplemental Figure 3.** Functional assessment of HM-related variants. (A) Immunofluorescent staining of wild type and mutated plasmids overexpressed in HEK293 cells with anti-GlyRa2. (B) Isolation of biotinylated membrane protein of wild-type and mutated GlyRa2. (C) Electrophysiological characteristics of wild-type and mutated GlyRa2.

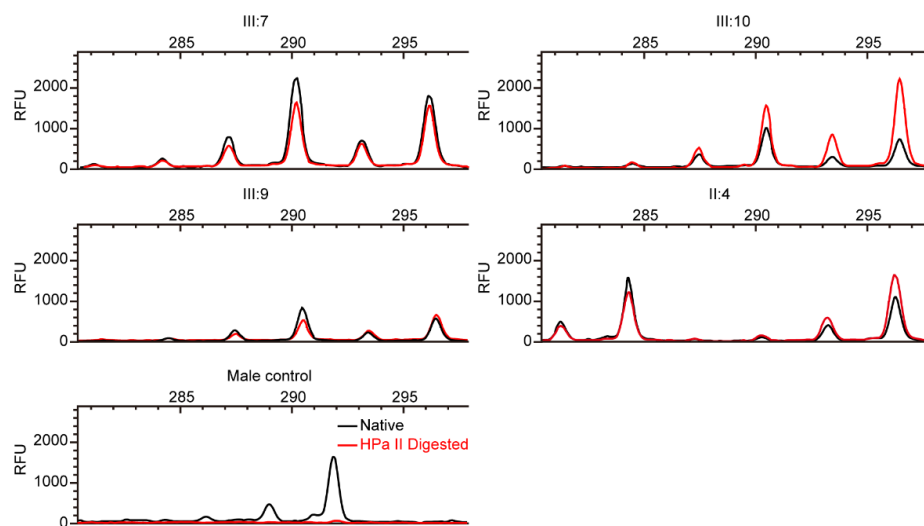

**Supplemental Figure 4.** X-inactivation proportion of asymptomatic subject III:9 in HM1 family. The results show no skewed inactivation of X chromosome between subject III:9 and other female patients.

## Supplemental tables

Supplemental Table 1. Primers were used in this study.

| Primer Name        | Primer sequence 5'-3'         | Product size | Note                                  |
|--------------------|-------------------------------|--------------|---------------------------------------|
| <i>GLRA2</i> -E1F  | CCAACCTCCCTTGCATGGTG          | 631bp        | Amplify <i>GLRA2</i> exon 1           |
| <i>GLRA2</i> -E1R  | CGTTGGCTGTGAAAATGTGTG         |              |                                       |
| <i>GLRA2</i> -E2F  | GTGACGCGACTCAGGATTTA          | 633bp        | Amplify <i>GLRA2</i> exon 2           |
| <i>GLRA2</i> -E2R  | TCAGCCACACTCCCCTTAC           |              |                                       |
| <i>GLRA2</i> -E3F  | ACTCTTCAGGGTAAGTTGCCA         | 553bp        | Amplify <i>GLRA2</i> exon 3           |
| <i>GLRA2</i> -E3R  | GAGGCGAGCAAAGTTGAAA           |              |                                       |
| <i>GLRA2</i> -E5F  | AAAAGCACTGCCCTGAGTTG          | 680bp        | Amplify <i>GLRA2</i> exon 5           |
| <i>GLRA2</i> -E5R  | CCCTTCCTGCCAGAATTCCT          |              |                                       |
| <i>GLRA2</i> -E5S  | GGGGTTGGTCAGTATATAGGGA        | —            | <i>GLRA2</i> exon 5 sequencing primer |
| <i>GLRA2</i> -E4F  | ACTCGGACACCAAAGCTGTA          | 488bp        | Amplify <i>GLRA2</i> exon 4           |
| <i>GLRA2</i> -E4R  | GGGACTTCTGACACTCTCCA          |              |                                       |
| <i>GLRA2</i> -E6F  | TGGCTCCAATGACACAGAGT          | 458bp        | Amplify <i>GLRA2</i> exon 6           |
| <i>GLRA2</i> -E6R  | TTTGAGCCAAATCAGGTCCG          |              |                                       |
| <i>GLRA2</i> -E7F  | CGTAGGGTGAACATTTTGTGC         | 528bp        | Amplify <i>GLRA2</i> exon 7           |
| <i>GLRA2</i> -E7R  | TTCCCATGTTCCCAGATCC           |              |                                       |
| <i>GLRA2</i> -E8F  | GCGTGTGACTTTTCAGTGCTC         | 691bp        | Amplify <i>GLRA2</i> exon 8           |
| <i>GLRA2</i> -E8R  | GGAGCCCAGTTACTTCCGAA          |              |                                       |
| <i>GLRA2</i> -E9F  | CCTCCCACACCACCAGTTAA          | 721bp        | Amplify <i>GLRA2</i> exon 9           |
| <i>GLRA2</i> -E9R  | TGACCCCGCATATCATGTCT          |              |                                       |
| <i>mGla2</i> -E2F  | AGCAAGTGAGAAAATAAGCATGT       | 279bp        | Amplify <i>Gla2</i> knockout allele   |
| <i>mGla2</i> -E2R  | TGCAAGCAAACCTCTATCATTGG       |              |                                       |
| <i>mGla2</i> -E2Fb | ACTTGGTTGACATTGCTCAGG         | 440bp        | Amplify <i>Gla2</i> wild type allele  |
| <i>mGla2</i> -E2Rb | CAGGGAGGCTGAAATTGTGT          |              |                                       |
| <i>mSRY</i> -F     | GTGACACTTTAGCCCTCCGA          | 334bp        | Amplify sex determine gene            |
| <i>mSRY</i> -R     | TAGTGTTACGCCCTACAGCC          |              |                                       |
| <i>ARF</i>         | HEX-GCTGTGAAGGTTGCTGTTCCCTCAT | 288bp        | ChrX-inactivation detection           |
| <i>ARR</i>         | TCCAGAATCTGTTCCAGAGCGTGC      |              |                                       |

**Supplemental Table 2.** Genome-wide multi-point parameter linkage analysis results of HM1 family.

| Cytoband     | Markers   | LOD_Score | Size   |
|--------------|-----------|-----------|--------|
|              | rs7066674 | -0.07     |        |
|              | rs4830891 | 2.88      |        |
|              | ...       |           |        |
|              | rs4825340 | 2.88      |        |
|              | ...       |           |        |
| Xp22.2-p11.4 | rs6633421 | 2.88      | 24.7Mb |
|              | rs4332301 | 1.89      |        |
|              | ...       |           |        |
|              | rs5971622 | 0.88      |        |
|              | ...       |           |        |
|              | rs1801686 | 0.31      |        |
|              | rs6609813 | -2.07     |        |

**Supplemental Table 3.** *Gra2* knockout mice ocular biometry measured by OCT.

| Measurements     | Wild type (mm, mean $\pm$ SEM) | Knockout (mm, mean $\pm$ SEM) | n, p-value         |
|------------------|--------------------------------|-------------------------------|--------------------|
| Cornea thickness | 0.1259 $\pm$ 0.0037            | 0.1167 $\pm$ 0.0037           | p=0.049*, n=8pairs |
| Cornea radius    | 1.524 $\pm$ 0.0370             | 1.504 $\pm$ 0.0251            | p=0.6857, n=8pairs |
| Chamber depth    | 0.4086 $\pm$ 0.0107            | 0.4174 $\pm$ 0.0064           | p=0.5422, n=8pairs |
| Lens thickness   | 1.821 $\pm$ 0.0440             | 1.804 $\pm$ 0.0296            | p=0.7580, n=8pairs |
| Vitreous depth   | 0.5731 $\pm$ 0.0155            | 0.5793 $\pm$ 0.0102           | p=0.7618, n=8pairs |
| Retina thickness | 0.1876 $\pm$ 0.0051            | 0.1825 $\pm$ 0.0046           | p=0.4658, n=8pairs |
| Axial length     | 2.929 $\pm$ 0.0721             | 2.913 $\pm$ 0.04755           | p=0.8609, n=8pairs |

**Supplemental Table 4.** Photopic 3.0 ERG results of *Gira2* knockout mice.

| Measurements         | Wild-type ( $\mu\text{V}$ , mean $\pm$ SEM) | Knockout ( $\mu\text{V}$ , mean $\pm$ SEM) | n, p-value         |
|----------------------|---------------------------------------------|--------------------------------------------|--------------------|
| Photopic 3.0 a wave  | 8.386 $\pm$ 0.7088                          | 7.284 $\pm$ 0.7756                         | p=0.291, n=11pairs |
| Photopic 3.0 b wave  | 77.45 $\pm$ 5.081                           | 62.61 $\pm$ 4.763                          | p=0.093, n=11pairs |
| Photopic 3.0 flicker | 25.51 $\pm$ 1.516                           | 22.48 $\pm$ 1.796                          | p=0.296, n=11pairs |



**Supplemental Table 5.** Nonsynonymous variants on the *GLRA2* gene were reported previously and in the current study.

| No. | Patient_ID            | Sex | Variation              | Inheritance | Phenotype                                                                                                                                                                                        |
|-----|-----------------------|-----|------------------------|-------------|--------------------------------------------------------------------------------------------------------------------------------------------------------------------------------------------------|
| 1   | 12724                 | F   | c.16G>C[1]             | de novo     | Autism.                                                                                                                                                                                          |
| 2   | 11842                 | M   | c.407A>G[1, 2]         | de novo     | Autism.                                                                                                                                                                                          |
| 3   | Patient 2             | M   | c.458G>A[2]            | de novo     | Non-syndromic autism, severe language delay with functional language, mild intellectual disability, generalized tonic-clonic seizures; But his autistic elder sister does not carry the variant. |
| 4   | AGP:<br>6323_3        | M   | E8-9del[2, 3]          | Maternal    | Autism, average IQ, language delay, bilateral HM, normal physical exam, no epilepsy; His mother and maternal grandfather are also myopic.                                                        |
| 5   | S00125-<br>ASD-GT     | F   | c.1049G>T[4, 5]        | Maternal    | Autism.                                                                                                                                                                                          |
| 6   | M21227                | M   | c.458G>A <sup>a</sup>  | NA          | HM.                                                                                                                                                                                              |
| 7   | HM1-II:4<br>HM2-III:5 | F   | c.539C>T <sup>a</sup>  | Familial    | Among these two families, 18 patients with HM, two heterozygotes with normal phenotype.                                                                                                          |
| 8   | HM3-III:3             | F   | c.1021G>A <sup>a</sup> | Familial    | Two heterozygotes with HM, two heterozygotes with normal phenotype, and two patients without the variant.                                                                                        |

a, this study; NA, not available

### Supplemental references

1. Iossifov I, O’Roak BJ, Sanders SJ, Ronemus M, Krumm N, Levy D, Stessman HA, Witherspoon KT, Vives L, Patterson KE, Smith JD, Paepfer B, Nickerson DA, Dea J, Dong S, Gonzalez LE, Mandell JD, Mane SM, Murtha MT, Sullivan CA, Walker MF, Waqar Z, Wei L, Willsey AJ, Yamrom B, Lee YH, Grabowska E, Dalkic E, Wang Z, Marks S, Andrews P, Leotta A, Kendall J, Hakker I, Rosenbaum J, Ma B, Rodgers L, Troge J, Narzisi G, Yoon S, Schatz MC, Ye K, McCombie WR, Shendure J, Eichler EE, State MW, Wigler M. The contribution of de novo coding mutations to autism spectrum disorder. *Nature*. 2014;515(7526):216-21.
2. Pilorge M, Fassier C, Le Corronc H, Potey A, Bai J, De Gois S, Delaby E, Assouline B, Guinchat V, Devillard F, Delorme R, Nygren G, Rastam M, Meier JC, Otani S, Cheval H, James VM, Topf M, Dear TN, Gillberg C, Leboyer M, Giros B, Gautron S, Hazan J, Harvey RJ, Legendre P, Betancur C. Genetic and functional analyses demonstrate a role for abnormal glycinergic signaling in autism. *Mol Psychiatry*. 2016;21(7):936-45.
3. Pinto D, Pagnamenta AT, Klei L, Anney R, Merico D, Regan R, Conroy J, Magalhaes TR, Correia C, Abrahams BS, Almeida J, Bacchelli E, Bader GD, Bailey AJ, Baird G, Battaglia A, Berney T, Bolshakova N, Bolte S, Bolton PF, Bourgeron T, Brennan S, Brian J, Bryson SE, Carson AR, Casallo G, Casey J, Chung BH, Cochrane L, Corsello C, Crawford EL, Crossett A, Cytrynbaum C, Dawson G, de Jonge M, Delorme R, Drmic I, Duketis E, Duque F, Estes A, Farrar P, Fernandez BA, Folstein SE, Fombonne E, Freitag CM, Gilbert J, Gillberg C, Glessner JT, Goldberg J, Green A, Green J, Guter SJ, Hakonarson H, Heron EA, Hill M, Holt R, Howe JL, Hughes G, Hus V, Iglizzi R, Kim C, Klauck SM, Kolevzon A, Korvatska O, Kustanovich V, Lajonchere CM, Lamb JA, Laskawiec M, Leboyer M, Le Couteur A, Leventhal BL, Lionel AC, Liu XQ, Lord C, Lotspeich L, Lund SC, Maestrini E, Mahoney W, Mantoulan C, Marshall CR, McConachie H, McDougle CJ, McGrath J, McMahon WM, Merikangas A, Migita O, Minshew NJ, Mirza GK, Munson J, Nelson SF, Noakes C, Noor A, Nygren G, Oliveira G, Papanikolaou K, Parr JR, Parrini B, Paton T, Pickles A, Pilorge M, Piven J, Ponting CP, Posey DJ, Poustka A, Poustka F, Prasad A, Ragoussis J, Renshaw K, Rickaby J, Roberts W, Roeder K, Roge B, Rutter ML, Bierut LJ, Rice JP, Salt J, Sansom K, Sato D, Segurado R, Sequeira AF, Senman L, Shah N, Sheffield VC, Soorya L, Sousa I, Stein O, Sykes N, Stoppioni V, Strawbridge C, Tancredi R, Tansey K, Thiruvahindrapduram B, Thompson AP, Thomson S, Tryfon A, Tsiantis J, Van Engeland H, Vincent JB, Volkmar F, Wallace S, Wang K, Wang Z, Wassink TH, Webber C, Weksberg R, Wing K, Wittmeyer K, Wood S, Wu J, Yaspan BL, Zurawiecki D, Zwaigenbaum L, Buxbaum JD, Cantor RM, Cook EH, Coon H, Cuccaro ML, Devlin B, Ennis S, Gallagher L, Geschwind DH, Gill M, Haines JL, Hallmayer J, Miller J, Monaco AP, Nurnberger JI, Jr., Paterson AD, Pericak-Vance MA, Schellenberg GD, Szatmari P, Vicente AM, Vieland VJ, Wijsman EM, Scherer SW, Sutcliffe JS, Betancur C. Functional impact of global rare copy number variation in autism spectrum disorders. *Nature*. 2010;466(7304):368-72.
4. Piton A, Gauthier J, Hamdan FF, Lafreniere RG, Yang Y, Henrion E, Laurent S, Noreau A, Thibodeau P, Karemera L, Spiegelman D, Kuku F, Duguay J, Destroismaisons L, Jolivet P, Cote M, Lachapelle K, Diallo O, Raymond A, Marineau C, Champagne N, Xiong L, Gaspar C, Riviere JB, Tarabeux J, Cossette P, Krebs MO, Rapoport JL, Addington A, Delisi LE, Mottron L, Joober R, Fombonne E, Drapeau P, Rouleau GA. Systematic resequencing of X-chromosome synaptic genes in autism spectrum disorder and schizophrenia. *Mol Psychiatry*. 2011;16(8):867-80.

5. Zhang Y, Ho TNT, Harvey RJ, Lynch JW, Keramidas A. Structure-function analysis of the GlyR alpha2 subunit autism mutation p.R323L reveals a gain-of-function. *Front Mol Neurosci.* 2017;10:158.
